# Supplementary material for: A Randomized, Double‐Blind, Placebo‐Controlled, First‐Time‐in‐Human Study to Assess the Safety, Tolerability, and Pharmacokinetics of Single and Multiple Ascending Doses of GSK3389404 in Healthy Subjects
Source: PubMed Central journal article supplement — Clin Pharmacol Drug Dev. 2019 Mar 12;8(6):790–801. doi: 10.1002/cpdd.670 (PMC6767536; doi:10.1002/cpdd.670), 2019-03-12

**Supplemental Figure 1.** Summary of patient disposition.

All subjects screened population.

<sup>a</sup>Subject withdrew from the study during the off-treatment follow-up period due to personal reasons.

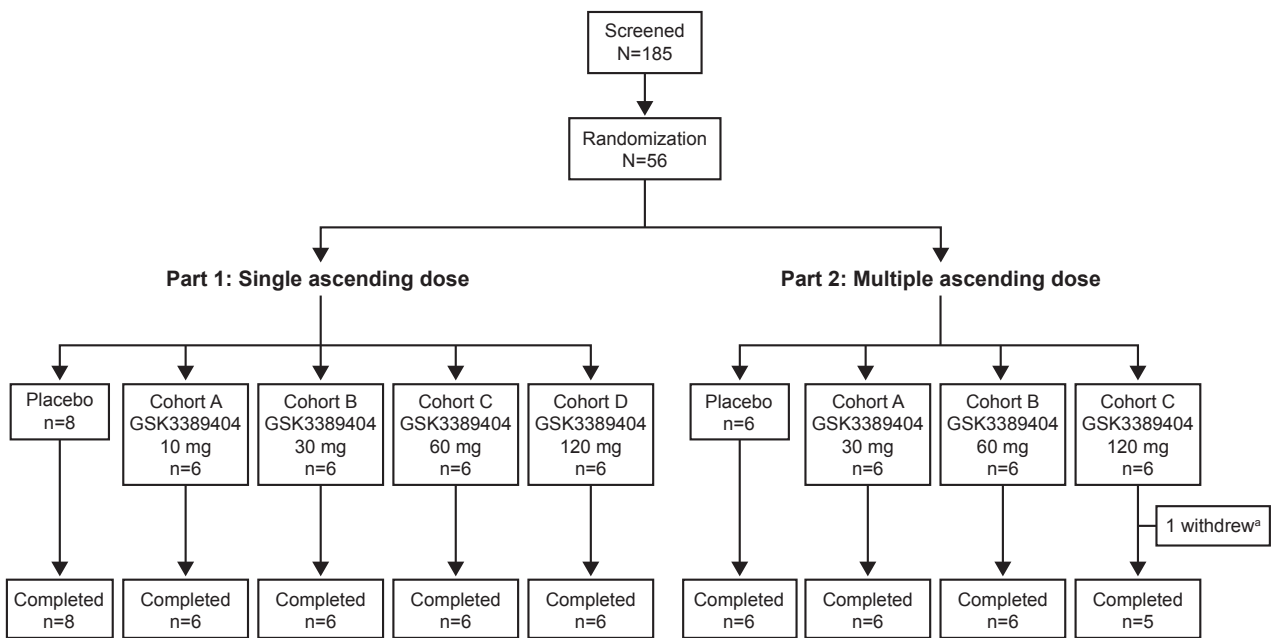

Supplement: CPDD-8-790-s001.pdf [file CPDD-8-790-s001.pdf]
